# Supplementary material
Source: Springer Nature journal article supplement (https://www.springermedizin.de/resource/supplementary/13058_2013_3349_MOESM7_ESM.pdf/9703904)
Supplement: MOESM7 [file 9703904]

**Table 2A:** Distribution of IBC/non-IBC status by TNBC subtypes using our gene signatures

|               | IBC(%)   | N-IBC(%)  | P-value |
|---------------|----------|-----------|---------|
| Subtype1(M)   | 4 (9.7)  | 7 (13.2)  | 0.5023  |
| Subtype2(IM)  | 3 (7.3)  | 12 (22.6) |         |
| Subtype3(BL1) | 9 (21.9) | 8 (15.0)  |         |
| Subtype4(BL2) | 3 (7.3)  | 2 (3.7)   |         |
| Subtype5(LAR) | 6 (14.6) | 6 (11.3)  |         |
| Subtype6(US)  | 8 (19.5) | 10 (18.8) |         |
| Subtype7(MSL) | 8 (19.5) | 8 (15)    |         |

**Table 2B:** Distribution of IBC/non-IBC status by TNBC subtypes using Lehmann's gene signatures

|     | IBC(%)    | N-IBC(%)  | P-value |
|-----|-----------|-----------|---------|
| M   | 5 (12.1)  | 10 (18.8) | 0.4528  |
| IM  | 5 (12.1)  | 12 (22.6) |         |
| BL1 | 12 (29.2) | 10 (18.8) |         |
| BL2 | 2 (4.8)   | 4 (7.5)   |         |
| LAR | 7 (14.6)  | 7 (13.2)  |         |
| US  | 2 (4.8)   | 5 (9.4)   |         |
| MSL | 8 (19.5)  | 5 (9.4)   |         |
